# Supplementary material for: Low Concentration of S100A8/9 Promotes Angiogenesis-Related Activity of Vascular Endothelial Cells: Bridges among Inflammation, Angiogenesis, and Tumorigenesis?
Source: Hindawi journal article supplement (doi:10.1155/2012/248574), 2012-01-01
Supplement: f1 [file 248574.f1.pdf]

**Table S1. Folds of genes expression change in HUVEC after treatment with 10ug/mL S100A8**

| Probe <sup>a,b</sup> | RefSeq       | Gene description                                                                                                                                                          | fold-4hr | fold-24hr |
|----------------------|--------------|---------------------------------------------------------------------------------------------------------------------------------------------------------------------------|----------|-----------|
| A_23_P120883         | NM_002133    | heme oxygenase (decycling) 1                                                                                                                                              | 1.686    | 1.881     |
| A_24_P418517         | AL353580     | nucleophosmin pseudogene                                                                                                                                                  | 1.746    | 1.746     |
| A_24_P59239          |              |                                                                                                                                                                           | 1.751    | 1.723     |
| A_24_P170186         |              |                                                                                                                                                                           | 1.724    | 1.744     |
| A_24_P178154         |              |                                                                                                                                                                           | 1.716    | 1.678     |
| A_24_P58759          | AC008628     | similar to chaperonin containing Tcp1, subunit 5 (epsilon)                                                                                                                | 1.651    | 1.670     |
| A_24_P33429          | AADB02001452 | similar to nucleophosmin 1                                                                                                                                                | 1.635    | 1.680     |
| A_24_P621434         |              |                                                                                                                                                                           | 1.605    | 1.709     |
| A_24_P358337         |              |                                                                                                                                                                           | 1.687    | 1.595     |
| A_24_P814872         |              |                                                                                                                                                                           | 1.635    | 1.598     |
| A_24_P350160         | NM_198262    | arginine/serine-rich coiled-coil 2                                                                                                                                        | 1.690    | 1.543     |
| A_24_P306921         | AADB02017686 | similar to ATP synthase, H <sup>+</sup> transporting, mitochondrial F0 complex, subunit B1                                                                                | 1.629    | 1.591     |
| A_24_P332862         | NM_175910    | zinc finger protein 493                                                                                                                                                   | 1.642    | 1.561     |
| A_24_P202497         | NM_020648    | twisted gastrulation homolog 1 (Drosophila)                                                                                                                               | 1.565    | 1.548     |
| A_24_P209378         | NM_016220    | zinc finger protein 107                                                                                                                                                   | 1.553    | 1.519     |
| A_24_P281801         |              |                                                                                                                                                                           | 1.533    | 1.526     |
| A_24_P32849          | NM_001011725 | heterogeneous nuclear ribonucleoprotein A1-like 2                                                                                                                         | 1.764    |           |
| A_32_P165477         | NM_014331    | solute carrier family 7, (cationic amino acid transporter, y <sup>+</sup> system) member 11                                                                               |          | 1.755     |
| A_32_P24376          | NM_033184    | keratin associated protein 2-1; keratin associated protein 2-4; keratin associated protein 2-3; similar to keratin associated protein 2-4; keratin associated protein 2-2 |          | 1.742     |
| A_32_P87013          | NM_000584    | interleukin 8                                                                                                                                                             |          | 1.738     |
| A_23_P253622         | XM_001719592 | similar to KIAA1641; similar to ankyrin repeat domain 26; ankyrin repeat domain 36B                                                                                       | 1.725    |           |
| A_23_P428287         | NM_001080383 | gap junction protein, gamma 1, 45kDa                                                                                                                                      | 1.724    |           |
| A_24_P187094         |              |                                                                                                                                                                           |          | 1.723     |
| A_24_P307075         | AC097709     | similar to heterogeneous nuclear ribonucleoprotein A1                                                                                                                     | 1.708    |           |
| A_23_P142272         | NM_019088    | Paf1, RNA polymerase II associated factor, homolog (S. cerevisiae)                                                                                                        | 1.706    |           |
| A_24_P717305         |              |                                                                                                                                                                           | 1.699    |           |
| A_32_P24382          | NM_033184    | keratin associated protein 2-1; keratin associated protein 2-4; keratin associated protein 2-3; similar to keratin associated protein 2-4; keratin associated protein 2-2 |          | 1.683     |

|              |              |                                                                                                                                     |       |
|--------------|--------------|-------------------------------------------------------------------------------------------------------------------------------------|-------|
| A_24_P273284 |              |                                                                                                                                     | 1.660 |
| A_23_P317620 | NM_005737    | ADP-ribosylation factor-like 4C                                                                                                     | 1.649 |
| A_32_P28365  | NM_152298    | nuclear autoantigenic sperm protein (histone-binding)                                                                               | 1.644 |
| A_24_P16892  | NM_003184    | TAF2 RNA polymerase II, TATA box binding protein (TBP)-associated factor, 150kDa                                                    | 1.625 |
| A_32_P126467 | BX537549     | hypothetical LOC645784                                                                                                              | 1.612 |
| A_23_P53557  | NM_002342    | lymphotoxin beta receptor (TNFR superfamily, member 3)                                                                              | 1.611 |
| A_24_P58187  | XM_062025    | similar to heterogeneous nuclear ribonucleoprotein A1-like                                                                          | 1.608 |
| A_24_P521662 |              |                                                                                                                                     | 1.604 |
| A_24_P229807 |              |                                                                                                                                     | 1.604 |
| A_24_P256764 | NM_005964    | myosin, heavy chain 10, non-muscle                                                                                                  | 1.587 |
| A_23_P501634 | NM_078476    | butyrophilin, subfamily 2, member A1                                                                                                | 1.585 |
| A_24_P42316  | NM_018429    | B double prime 1, subunit of RNA polymerase III transcription initiation factor IIIB                                                | 1.585 |
| A_23_P4014   | NM_017575    | Smg-6 homolog, nonsense mediated mRNA decay factor (C. elegans)                                                                     | 1.583 |
| A_32_P56525  | NM_014719    | family with sequence similarity 115, member A; family with sequence similarity 115, member B (pseudogene)                           | 1.580 |
| A_24_P541482 |              |                                                                                                                                     | 1.579 |
| A_32_P83326  | AC139495     | hypothetical LOC100272216                                                                                                           | 1.578 |
| A_24_P150486 | NM_004863    | serine palmitoyltransferase, long chain base subunit 2                                                                              | 1.577 |
| A_32_P207054 | NM_013986    | similar to Ewing sarcoma breakpoint region 1; Ewing sarcoma breakpoint region 1                                                     | 1.576 |
| A_24_P247536 | NM_152789    | family with sequence similarity 133, member B pseudogene; similar to FAM133B protein; family with sequence similarity 133, member B | 1.569 |
| A_24_P409904 | AK130705     | hypothetical LOC100272216                                                                                                           | 1.568 |
| A_32_P181513 | XM_001719792 | zinc finger protein 730                                                                                                             | 1.565 |
| A_23_P103996 | NM_002061    | glutamate-cysteine ligase, modifier subunit                                                                                         | 1.561 |
| A_23_P161698 | NM_002422    | matrix metalloproteinase 3 (stromelysin 1, progelatinase)                                                                           | 1.557 |
| A_23_P50834  | NM_182515    | zinc finger protein 714                                                                                                             | 1.553 |
| A_24_P41662  |              |                                                                                                                                     | 1.552 |
| A_32_P221958 | NM_001077685 | ArfGAP with GTPase domain, ankyrin repeat and PH domain 7                                                                           | 1.552 |
| A_24_P324405 | XM_001720760 | ankyrin repeat domain 11; hypothetical                                                                                              | 1.545 |

|              |              |                                                                                                                                                                                          |       |       |
|--------------|--------------|------------------------------------------------------------------------------------------------------------------------------------------------------------------------------------------|-------|-------|
|              |              | protein LOC100128265                                                                                                                                                                     |       |       |
| A_24_P288993 | NM_001168331 | hypothetical gene supported by AF044957;<br>NM_004547; NADH dehydrogenase<br>(ubiquinone) 1 beta subcomplex, 4, 15kDa                                                                    |       | 1.541 |
| A_32_P82409  |              |                                                                                                                                                                                          |       | 1.537 |
| A_24_P131785 | NM_003704    | chromosome 4 open reading frame 8                                                                                                                                                        | 1.535 |       |
| A_24_P41530  |              |                                                                                                                                                                                          | 1.531 |       |
| A_32_P216426 |              |                                                                                                                                                                                          | 1.528 |       |
| A_23_P44643  | NM_001137664 | anaphase promoting complex subunit 7                                                                                                                                                     | 1.526 |       |
| A_32_P148345 | NM_004039    | annexin A2 pseudogene 3; annexin A2;<br>annexin A2 pseudogene 1                                                                                                                          | 1.524 |       |
| A_24_P891276 | CH236948     | hypothetical LOC442292                                                                                                                                                                   | 1.518 |       |
| A_24_P384059 | AL450226     | heterogeneous nuclear ribonucleoprotein<br>A1pseudogene                                                                                                                                  | 1.517 |       |
| A_32_P116556 | NM_001127464 | zinc finger protein 469                                                                                                                                                                  |       | 1.515 |
| A_24_P101601 |              |                                                                                                                                                                                          | 1.512 |       |
| A_24_P418536 | AL359915     | ribosomal protein L6 pseudogene 2                                                                                                                                                        | 1.511 |       |
| A_24_P187355 |              |                                                                                                                                                                                          | 1.510 |       |
| A_24_P33525  |              |                                                                                                                                                                                          | 1.510 |       |
| A_32_P209735 | BI907421     | glucuronidase, beta-like 2; glucuronidase,<br>beta pseudogene                                                                                                                            | 1.510 |       |
| A_24_P290188 |              |                                                                                                                                                                                          |       | 1.509 |
| A_23_P206822 | NM_015171    | exportin 6                                                                                                                                                                               |       | 1.509 |
| A_23_P416395 | NM_003714    | stanniocalcin 2                                                                                                                                                                          |       | 1.507 |
| A_24_P204238 | XR_078725    | similar to Huntingtin interacting protein K                                                                                                                                              |       | 1.507 |
| A_24_P312189 | NM_019606    | methylphosphate capping enzyme                                                                                                                                                           | 1.501 |       |
| A_24_P889720 | NM_021009    | ubiquitin C                                                                                                                                                                              | 0.636 | 0.657 |
| A_24_P681218 |              |                                                                                                                                                                                          | 0.642 | 0.610 |
| A_23_P60933  | NM_005950    | metallothionein 1G                                                                                                                                                                       | 0.589 | 0.654 |
| A_23_P90143  | NM_012423    | ribosomal protein L13a pseudogene 7;<br>ribosomal protein L13a pseudogene 5;<br>ribosomal protein L13a pseudogene 16;<br>ribosomal protein L13a; ribosomal protein<br>L13a pseudogene 18 | 0.610 | 0.624 |
| A_32_P151544 | NM_199187    | keratin 18; keratin 18 pseudogene 26; keratin<br>18 pseudogene 19                                                                                                                        | 0.589 | 0.620 |
| A_24_P142223 | NM_033251    | ribosomal protein L13 pseudogene 12;<br>ribosomal protein L13                                                                                                                            | 0.585 | 0.624 |
| A_23_P217609 | NM_001032393 | ribosomal protein L36a pseudogene 51;<br>ribosomal protein L36a pseudogene 37;<br>ribosomal protein L36a pseudogene 49;<br>heterogeneous nuclear ribonucleoprotein H2                    | 0.549 | 0.653 |

|              |              |                                                                                                                                                                                                                                                                                                                                            |       |       |
|--------------|--------------|--------------------------------------------------------------------------------------------------------------------------------------------------------------------------------------------------------------------------------------------------------------------------------------------------------------------------------------------|-------|-------|
|              |              | (H'); ribosomal protein L36a                                                                                                                                                                                                                                                                                                               |       |       |
| A_24_P315986 |              |                                                                                                                                                                                                                                                                                                                                            | 0.551 | 0.613 |
| A_23_P166459 | NM_002305    | lectin, galactoside-binding, soluble, 1                                                                                                                                                                                                                                                                                                    | 0.526 | 0.637 |
| A_23_P46182  | NM_001012    | ribosomal protein S8; ribosomal protein S8<br>pseudogene 8; ribosomal protein S8<br>pseudogene 10                                                                                                                                                                                                                                          | 0.515 | 0.646 |
| A_32_P208178 | XM_001719310 | ribosomal protein S3A pseudogene 5;<br>ribosomal protein S3a pseudogene 47;<br>ribosomal protein S3a pseudogene 49;<br>ribosomal protein S3A; hypothetical<br>LOC100131699; hypothetical<br>LOC100130107                                                                                                                                   | 0.509 | 0.650 |
| A_23_P252413 | NM_005953    | metallothionein 2A                                                                                                                                                                                                                                                                                                                         | 0.530 | 0.624 |
| A_32_P11931  | NM_000987    | ribosomal protein L26 pseudogene 33;<br>ribosomal protein L26; ribosomal protein L26<br>pseudogene 16; ribosomal protein L26<br>pseudogene 19; ribosomal protein L26<br>pseudogene 6                                                                                                                                                       | 0.524 | 0.627 |
| A_24_P681301 | NM_021009    | ubiquitin C                                                                                                                                                                                                                                                                                                                                | 0.553 | 0.581 |
| A_32_P857658 | NM_001003    | ribosomal protein, large, P1                                                                                                                                                                                                                                                                                                               | 0.515 | 0.616 |
| A_24_P754803 | NM_006013    | ribosomal protein L10; ribosomal protein L10<br>pseudogene 15; ribosomal protein L10<br>pseudogene 6; ribosomal protein L10<br>pseudogene 16; ribosomal protein L10<br>pseudogene 9                                                                                                                                                        | 0.565 | 0.558 |
| A_23_P120660 | NM_001024    | ribosomal protein S21                                                                                                                                                                                                                                                                                                                      | 0.495 | 0.626 |
| A_23_P423419 | NR_022014    | chromosome 15 open reading frame 21                                                                                                                                                                                                                                                                                                        | 0.528 | 0.552 |
| A_32_P137939 | NM_001101    | actin, beta                                                                                                                                                                                                                                                                                                                                | 0.508 | 0.565 |
| A_23_P147888 | NM_001004    | ribosomal protein, large, P2 pseudogene 3;<br>ribosomal protein, large, P2                                                                                                                                                                                                                                                                 | 0.478 | 0.589 |
| A_32_P190488 | AC078817     | ribosomal protein L26 pseudogene 32                                                                                                                                                                                                                                                                                                        | 0.461 | 0.605 |
| A_24_P142228 | NM_033251    | ribosomal protein L13 pseudogene 12;<br>ribosomal protein L13                                                                                                                                                                                                                                                                              | 0.521 | 0.524 |
| A_32_P175198 | NM_001614    | actin, gamma 1                                                                                                                                                                                                                                                                                                                             | 0.484 | 0.545 |
| A_24_P135902 | NM_002952    | ribosomal protein S2 pseudogene 8;<br>ribosomal protein S2 pseudogene 11;<br>ribosomal protein S2 pseudogene 5;<br>ribosomal protein S2 pseudogene 12;<br>ribosomal protein S2 pseudogene 51;<br>ribosomal protein S2 pseudogene 17;<br>ribosomal protein S2 pseudogene 55;<br>ribosomal protein S2 pseudogene 20;<br>ribosomal protein S2 | 0.437 | 0.571 |

|              |              |                                                                                                                                                                                                                                                                                                                                                    |       |       |
|--------------|--------------|----------------------------------------------------------------------------------------------------------------------------------------------------------------------------------------------------------------------------------------------------------------------------------------------------------------------------------------------------|-------|-------|
| A_32_P184796 | NM_053275    | ribosomal protein, large, P0 pseudogene 2;<br>ribosomal protein, large, P0 pseudogene 3;<br>ribosomal protein, large, P0 pseudogene 6;<br>ribosomal protein, large, P0                                                                                                                                                                             | 0.507 | 0.499 |
| A_24_P922631 | NM_001102609 | hypothetical protein LOC133874                                                                                                                                                                                                                                                                                                                     | 0.461 | 0.515 |
| A_23_P201711 | NM_014624    | S100 calcium binding protein A6                                                                                                                                                                                                                                                                                                                    | 0.418 | 0.552 |
| A_24_P148235 | NM_001030    | ribosomal protein S27 pseudogene 29;<br>ribosomal protein S27 pseudogene 9;<br>ribosomal protein S27 pseudogene 23;<br>ribosomal protein S27 pseudogene 13;<br>ribosomal protein S27; ribosomal protein S27<br>pseudogene 21; ribosomal protein S27<br>pseudogene 7; ribosomal protein S27<br>pseudogene 6; ribosomal protein S27<br>pseudogene 19 | 0.438 | 0.524 |
| A_24_P179339 |              |                                                                                                                                                                                                                                                                                                                                                    | 0.499 | 0.450 |
| A_24_P113109 | NM_018955    | ubiquitin B                                                                                                                                                                                                                                                                                                                                        | 0.484 | 0.460 |
| A_23_P331028 | NM_015335    | mediator complex subunit 13-like                                                                                                                                                                                                                                                                                                                   | 0.446 | 0.490 |
| A_23_P106708 | NM_002952    | ribosomal protein S2 pseudogene 8;<br>ribosomal protein S2 pseudogene 11;<br>ribosomal protein S2 pseudogene 5;<br>ribosomal protein S2 pseudogene 12;<br>ribosomal protein S2 pseudogene 51;<br>ribosomal protein S2 pseudogene 17;<br>ribosomal protein S2 pseudogene 55;<br>ribosomal protein S2 pseudogene 20;<br>ribosomal protein S2         | 0.418 | 0.513 |
| A_23_P106844 | NM_005953    | metallothionein 2A                                                                                                                                                                                                                                                                                                                                 | 0.421 | 0.492 |
| A_24_P361896 | NM_005953    | metallothionein 2A                                                                                                                                                                                                                                                                                                                                 | 0.417 | 0.470 |
| A_24_P179336 |              |                                                                                                                                                                                                                                                                                                                                                    | 0.454 | 0.426 |
| A_23_P37445  | NM_213725    | ribosomal protein, large, P1                                                                                                                                                                                                                                                                                                                       | 0.401 | 0.470 |
| A_23_P135084 | NM_000972    | ribosomal protein L7a pseudogene 70;<br>ribosomal protein L7a; ribosomal protein L7a<br>pseudogene 30; ribosomal protein L7a<br>pseudogene 66; ribosomal protein L7a<br>pseudogene 27; ribosomal protein L7a<br>pseudogene 11; ribosomal protein L7a<br>pseudogene 62                                                                              | 0.405 | 0.421 |
| A_24_P323805 |              |                                                                                                                                                                                                                                                                                                                                                    | 0.353 | 0.451 |
| A_23_P214046 | NM_033644    | F-box and WD repeat domain containing 11                                                                                                                                                                                                                                                                                                           | 0.665 |       |
| A_32_P49728  | XM_002342218 | hypothetical protein LOC339803                                                                                                                                                                                                                                                                                                                     | 0.664 |       |
| A_24_P188071 | NM_032704    | tubulin, alpha 1c                                                                                                                                                                                                                                                                                                                                  | 0.662 |       |

|              |              |                                                                                                                                                              |       |       |
|--------------|--------------|--------------------------------------------------------------------------------------------------------------------------------------------------------------|-------|-------|
| A_32_P342064 | NM_002032    | ferritin, heavy polypeptide 1; ferritin, heavy polypeptide-like 16; similar to ferritin, heavy polypeptide 1; ferritin, heavy polypeptide-like 3 pseudogene  | 0.659 |       |
| A_23_P368205 | NM_001135637 | phosphatidylinositol-4-phosphate 5-kinase, type I, alpha                                                                                                     |       | 0.658 |
| A_24_P366989 |              |                                                                                                                                                              | 0.658 |       |
| A_24_P582241 |              |                                                                                                                                                              | 0.657 |       |
| A_32_P94798  | NM_004039    | annexin A2 pseudogene 3; annexin A2; annexin A2 pseudogene 1                                                                                                 |       | 0.657 |
| A_23_P97283  | NM_198406    | progesterin and adipoQ receptor family member VI                                                                                                             |       | 0.655 |
| A_32_P112380 | NM_178518    | transmembrane protein 102                                                                                                                                    | 0.655 |       |
| A_23_P38167  | NM_022036    | G protein-coupled receptor, family C, group 5, member C                                                                                                      |       | 0.654 |
| A_32_P53670  |              |                                                                                                                                                              | 0.653 |       |
| A_23_P59179  | NM_021976    | retinoid X receptor, beta                                                                                                                                    |       | 0.653 |
| A_23_P141389 | NM_000988    | ribosomal protein L27                                                                                                                                        | 0.652 |       |
| A_23_P77779  | NM_000981    | ribosomal protein L19; ribosomal protein L19 pseudogene 12                                                                                                   | 0.652 |       |
| A_32_P231391 |              |                                                                                                                                                              |       | 0.650 |
| A_32_P41487  | XM_001725257 | hypothetical LOC729505; similar to hCG2040565; high-mobility group nucleosomal binding domain 2; similar to high-mobility group nucleosomal binding domain 2 |       | 0.649 |
| A_24_P144025 | NM_001024    | ribosomal protein S21                                                                                                                                        | 0.648 |       |
| A_23_P208991 | NM_002579    | paralemmin                                                                                                                                                   |       | 0.648 |
| A_23_P65307  | NM_032229    | SLIT and NTRK-like family, member 6                                                                                                                          |       | 0.648 |
| A_23_P400181 | NR_026052    | hypothetical LOC65996                                                                                                                                        |       | 0.647 |
| A_24_P134074 | NM_001022    | ribosomal protein S19 pseudogene 3; ribosomal protein S19                                                                                                    | 0.647 |       |
| A_24_P14485  | NM_017495    | RNA binding motif protein 38                                                                                                                                 | 0.646 |       |
| A_23_P208358 | NM_001136134 | ribosomal protein L28                                                                                                                                        | 0.645 |       |
| A_23_P68240  | XM_002348280 | hypothetical protein LOC150763; similar to hCG1732629; similar to glycerol-3-phosphate acyltransferase, mitochondrial                                        | 0.645 |       |
| A_23_P79323  | NM_003936    | cyclin-dependent kinase 5, regulatory subunit 2 (p39)                                                                                                        | 0.644 |       |
| A_24_P258235 | NM_001004739 | olfactory receptor, family 5, subfamily L, member 2                                                                                                          | 0.643 |       |
| A_32_P24794  |              |                                                                                                                                                              | 0.642 |       |
| A_23_P218675 | NM_006103    | WAP four-disulfide core domain 2                                                                                                                             |       | 0.641 |

|              |              |                                                                                                                                                                                                                                     |       |       |
|--------------|--------------|-------------------------------------------------------------------------------------------------------------------------------------------------------------------------------------------------------------------------------------|-------|-------|
| A_24_P272590 | AC008446     | ribosomal protein S15 pseudogene 6                                                                                                                                                                                                  | 0.641 |       |
| A_23_P4679   | NM_006494    | Ets2 repressor factor                                                                                                                                                                                                               | 0.640 |       |
| A_23_P38085  | NM_001042476 | calcium regulated heat stable protein 1, 24kDa                                                                                                                                                                                      |       | 0.637 |
| A_24_P763243 | NM_001402    | eukaryotic translation elongation factor 1 alpha-like 7; eukaryotic translation elongation factor 1 alpha-like 3; similar to eukaryotic translation elongation factor 1 alpha 1; eukaryotic translation elongation factor 1 alpha 1 |       | 0.636 |
| A_23_P101532 | NM_001015    | ribosomal protein S11 pseudogene 5; ribosomal protein S11                                                                                                                                                                           | 0.634 |       |
| A_24_P58881  |              |                                                                                                                                                                                                                                     | 0.633 |       |
| A_23_P18292  | NM_003973    | ribosomal protein L14                                                                                                                                                                                                               | 0.632 |       |
| A_32_P93782  | NM_000987    | ribosomal protein L26 pseudogene 33; ribosomal protein L26; ribosomal protein L26 pseudogene 16; ribosomal protein L26 pseudogene 19; ribosomal protein L26 pseudogene 6                                                            | 0.632 |       |
| A_23_P141549 | NM_001011    | ribosomal protein S7; ribosomal protein S7 pseudogene 11; ribosomal protein S7 pseudogene 4; ribosomal protein S7 pseudogene 10                                                                                                     | 0.629 |       |
| A_23_P106204 | NM_145870    | glutathione transferase zeta 1                                                                                                                                                                                                      | 0.626 |       |
| A_24_P418418 | NM_001021    | ribosomal protein S17                                                                                                                                                                                                               | 0.620 |       |
| A_23_P70127  | NM_017510    | transmembrane emp24 protein transport domain containing 9                                                                                                                                                                           |       | 0.616 |
| A_24_P273666 | NM_016592    | GNAS complex locus                                                                                                                                                                                                                  |       | 0.614 |
| A_23_P315286 | NM_138774    | chromosome 19 open reading frame 22                                                                                                                                                                                                 | 0.613 |       |
| A_23_P374149 | NM_015050    | FtsJ methyltransferase domain containing 2                                                                                                                                                                                          |       | 0.612 |
| A_24_P204144 |              |                                                                                                                                                                                                                                     | 0.611 |       |
| A_23_P85171  | NM_000117    | emerin                                                                                                                                                                                                                              | 0.611 |       |
| A_24_P188941 | XM_496355    | nucleophosmin 1 (nucleolar phosphoprotein B23, numatrin) pseudogene 21; hypothetical LOC100131044; similar to nucleophosmin 1; nucleophosmin (nucleolar phosphoprotein B23, numatrin)                                               | 0.609 |       |
| A_23_P64090  | NM_030981    | RAB1B, member RAS oncogene family                                                                                                                                                                                                   | 0.606 |       |
| A_32_P36884  | CH471143     | FK506 binding protein 1C                                                                                                                                                                                                            | 0.605 |       |
| A_23_P117721 | NM_001021    | ribosomal protein S17                                                                                                                                                                                                               | 0.605 |       |
| A_23_P104188 | NM_004433    | E74-like factor 3 (ets domain transcription factor, epithelial-specific )                                                                                                                                                           |       | 0.603 |

|              |              |                                                                                                                                                                                                                                                                              |       |       |
|--------------|--------------|------------------------------------------------------------------------------------------------------------------------------------------------------------------------------------------------------------------------------------------------------------------------------|-------|-------|
| A_24_P213783 | NM_001099693 | ribosomal protein L31 pseudogene 49;<br>ribosomal protein L31 pseudogene 17;<br>ribosomal protein L31                                                                                                                                                                        | 0.599 |       |
| A_24_P160001 | NM_000801    | FK506 binding protein 1A, 12kDa                                                                                                                                                                                                                                              | 0.599 |       |
| A_23_P325093 | NM_178026    | gamma-glutamyltransferase 7                                                                                                                                                                                                                                                  |       | 0.597 |
| A_23_P157405 | XM_946272    | coiled-coil-helix-coiled-coil-helix domain<br>containing 2; similar to<br>coiled-coil-helix-coiled-coil-helix domain<br>containing 2                                                                                                                                         | 0.595 |       |
| A_24_P418239 | NM_001025071 | ribosomal protein S14                                                                                                                                                                                                                                                        | 0.595 |       |
| A_23_P33045  | NM_000987    | ribosomal protein L26 pseudogene 33;<br>ribosomal protein L26; ribosomal protein L26<br>pseudogene 16; ribosomal protein L26<br>pseudogene 19; ribosomal protein L26<br>pseudogene 6                                                                                         | 0.591 |       |
| A_23_P38167  |              |                                                                                                                                                                                                                                                                              | 0.591 |       |
| A_23_P141405 | NM_198175    | non-metastatic cells 1, protein (NM23A)<br>expressed in; NME1-NME2 readthrough<br>transcript; non-metastatic cells 2, protein<br>(NM23B) expressed in                                                                                                                        | 0.588 |       |
| A_23_P30464  | NM_030567    | proline rich 7 (synaptic)                                                                                                                                                                                                                                                    | 0.583 |       |
| A_23_P24763  | NM_001017    | ribosomal protein S13 pseudogene 8;<br>ribosomal protein S13; ribosomal protein S13<br>pseudogene 2                                                                                                                                                                          | 0.580 |       |
| A_23_P104318 | NM_019058    | DNA-damage-inducible transcript 4                                                                                                                                                                                                                                            |       | 0.579 |
| A_23_P128067 | NM_021104    | ribosomal protein L41                                                                                                                                                                                                                                                        | 0.575 |       |
| A_24_P388252 | NM_000945    | protein phosphatase 3 (formerly 2B),<br>regulatory subunit B, alpha isoform                                                                                                                                                                                                  | 0.567 |       |
| A_23_P6433   | NM_005368    | myoglobin                                                                                                                                                                                                                                                                    |       | 0.567 |
| A_23_P251593 | NM_007104    | ribosomal protein L10a pseudogene 6;<br>ribosomal protein L10a; ribosomal protein<br>L10a pseudogene 9                                                                                                                                                                       | 0.564 |       |
| A_23_P29747  | NM_000984    | ribosomal protein L23a pseudogene 63;<br>ribosomal protein L23a pseudogene 75;<br>ribosomal protein L23a pseudogene 37;<br>ribosomal protein L23a pseudogene 65;<br>ribosomal protein L23a pseudogene 43;<br>ribosomal protein L23a pseudogene 44;<br>ribosomal protein L23a | 0.559 |       |
| A_23_P502274 | NM_002751    | mitogen-activated protein kinase 11                                                                                                                                                                                                                                          | 0.557 |       |
| A_23_P208925 | NM_003025    | SH3-domain GRB2-like 1                                                                                                                                                                                                                                                       | 0.556 |       |
| A_23_P142475 | NM_001031    | ribosomal protein S28 pseudogene 6;<br>ribosomal protein S28 pseudogene 9;                                                                                                                                                                                                   | 0.546 |       |



ribosomal protein S28

|              |              |                                                                                                                                                                                                                               |       |
|--------------|--------------|-------------------------------------------------------------------------------------------------------------------------------------------------------------------------------------------------------------------------------|-------|
| A_23_P81492  | NM_001025071 | ribosomal protein S14                                                                                                                                                                                                         | 0.536 |
| A_32_P220307 | NM_001000    | ribosomal protein L39 pseudogene 10;<br>ribosomal protein L39 pseudogene 20;<br>ribosomal protein L39 pseudogene 27;<br>ribosomal protein L39; ribosomal protein L39<br>pseudogene 13; ribosomal protein L39<br>pseudogene 32 | 0.536 |
| A_32_P187327 | NM_006088    | tubulin, beta 2C                                                                                                                                                                                                              | 0.530 |
| A_23_P252322 | NM_001001977 | ATP synthase, H <sup>+</sup> transporting, mitochondrial<br>F1 complex, epsilon subunit pseudogene 2;<br>ATP synthase, H <sup>+</sup> transporting, mitochondrial<br>F1 complex, epsilon subunit                              | 0.512 |
| A_32_P75141  |              |                                                                                                                                                                                                                               | 0.498 |
| A_23_P33759  | NM_004753    | dehydrogenase/reductase (SDR family)<br>member 3                                                                                                                                                                              | 0.496 |
| A_23_P52298  | NM_006993    | nucleophosmin/nucleoplasmin, 3                                                                                                                                                                                                | 0.477 |

Note: <sup>a</sup> Agilent probe ID in 4X44 microarray.

<sup>b</sup> The probes/genes are basically listed in the order of change folds in either group.

**Table S2. Summary of the altered probes or their corresponding genes**

|                  | Up-regulated genes |                            |                 | down-regulated genes |                         |                 |
|------------------|--------------------|----------------------------|-----------------|----------------------|-------------------------|-----------------|
|                  | only at 4hr        | At both<br>4hr and<br>24hr | Only at<br>24hr | only at 4hr          | At both 4hr<br>and 24hr | Only at<br>24hr |
| probes           | 37                 | 16                         | 20              | 54                   | 38                      | 22              |
| Defined<br>genes | 29                 | 10                         | 13              | 44                   | 27                      | 20              |

**Table S3. Altered pathways upon S100A8 treatment\***

|                                        | Count | (%)  | P value  | Fold enrichment |
|----------------------------------------|-------|------|----------|-----------------|
| <b>Up-regulated at 4hr or 24hr</b>     |       |      |          |                 |
| none                                   |       |      |          |                 |
| <b>Downregulated at 4hr (total 2)</b>  |       |      |          |                 |
| Ribosome                               | 29    | 42.0 | 9.47E-41 | 37.7            |
| Pathogenic Escherichia coli infection  | 4     | 5.8  | 0.01     | 7.93            |
| <b>Downregulated at 24hr (total 4)</b> |       |      |          |                 |
| Ribosome                               | 14    | 28.6 | 3.66E-17 | 30.31           |
| Pathogenic Escherichia coli infection  | 4     | 8.2  | 0.003    | 13.22           |
| Vibrio cholerae infection              | 3     | 6.1  | 0.033    | 10.09           |
| Dilated cardiomyopathy                 | 3     | 6.1  | 0.080    | 6.14            |

**Table S4. Representatives of altered GOs upon S100A8 treatment<sup>a</sup>**

|                                                           | Count | (%)  | P value  | Fold enrichment |
|-----------------------------------------------------------|-------|------|----------|-----------------|
| <b>Up-regulation at 4hr (total 13)</b>                    |       |      |          |                 |
| regulation of transcription                               | 9     | 22.5 | 0.026    | 2.23            |
| in utero embryonic development                            | 3     | 7.5  | 0.027    | 10.98           |
| blood vessel morphogenesis                                | 3     | 7.5  | 0.038    | 9.16            |
| positive regulation of signal transduction                | 3     | 7.5  | 0.070    | 6.55            |
| secretion                                                 | 3     | 7.5  | 0.072    | 6.44            |
| skeletal system development                               | 3     | 7.5  | 0.080    | 6.06            |
| cardiac muscle tissue development                         | 2     | 5.0  | 0.081    | 22.60           |
| positive regulation of cell communication                 | 3     | 7.5  | 0.084    | 5.87            |
| <b>Up-regulation at 24hr (total 1)</b>                    |       |      |          |                 |
| response to oxidative stress                              | 3     | 12.5 | 0.009    | 19.04           |
| <b>Downregulation at 4hr (total 55)</b>                   |       |      |          |                 |
| translational elongation                                  | 32    | 46.4 | 3.33E-52 | 71.43           |
| ribosome biogenesis                                       | 11    | 15.9 | 1.06E-10 | 20.33           |
| rRNA processing                                           | 8     | 11.6 | 1.37E-07 | 19.61           |
| ncRNA processing                                          | 8     | 11.6 | 1.60E-05 | 9.65            |
| negative regulation of protein modification process       | 4     | 5.8  | 0.015    | 7.58            |
| erythrocyte homeostasis                                   | 3     | 4.3  | 0.019    | 13.80           |
| negative regulation of RNA splicing                       | 2     | 2.9  | 0.022    | 90.19           |
| long-term strengthening of neuromuscular junction         | 2     | 2.9  | 0.022    | 90.19           |
| regulation of apoptosis                                   | 9     | 13.0 | 0.023    | 2.52            |
| response to caffeine                                      | 2     | 2.9  | 0.034    | 56.37           |
| cytokine-mediated signaling pathway                       | 3     | 4.3  | 0.037    | 9.66            |
| response to purine                                        | 2     | 2.9  | 0.043    | 45.09           |
| negative regulation of cellular protein metabolic process | 4     | 5.8  | 0.044    | 5.01            |
| homeostatic process                                       | 8     | 11.6 | 0.044    | 2.40            |
| positive regulation of binding                            | 3     | 4.3  | 0.045    | 8.67            |
| axonogenesis                                              | 4     | 5.8  | 0.052    | 4.67            |
| positive regulation of protein ubiquitination             | 3     | 4.3  | 0.052    | 8.05            |
| release of sequestered calcium ion into cytosol           | 2     | 2.9  | 0.059    | 32.21           |

|                                                       |   |     |       |       |
|-------------------------------------------------------|---|-----|-------|-------|
| homeostasis of number of cells                        | 3 | 4.3 | 0.071 | 6.76  |
| nucleoside diphosphate metabolic process              | 2 | 2.9 | 0.072 | 26.53 |
| cellular di-, tri-valent inorganic cation homeostasis | 4 | 5.8 | 0.077 | 3.97  |
| cell morphogenesis involved in differentiation        | 4 | 5.8 | 0.090 | 3.70  |

**Downregulation at 24hr (total 32)**

|                                                       |    |      |          |        |
|-------------------------------------------------------|----|------|----------|--------|
| translational elongation                              | 17 | 34.7 | 2.36E-24 | 54.21  |
| axonogenesis                                          | 5  | 10.2 | 0.003    | 8.34   |
| cell morphogenesis involved in neuron differentiation | 5  | 10.2 | 0.004    | 7.71   |
| cell morphogenesis involved in differentiation        | 5  | 10.2 | 0.006    | 6.60   |
| cellular component morphogenesis                      | 6  | 12.2 | 0.007    | 4.87   |
| cell motion                                           | 6  | 12.2 | 0.014    | 4.07   |
| long-term strengthening of neuromuscular junction     | 2  | 4.1  | 0.015    | 128.84 |
| cell morphogenesis                                    | 5  | 10.2 | 0.022    | 4.52   |
| muscle cell differentiation                           | 3  | 6.1  | 0.052    | 7.99   |
| ribosome biogenesis                                   | 3  | 6.1  | 0.053    | 7.92   |
| ER-associated protein catabolic process               | 2  | 4.1  | 0.070    | 26.84  |
| <a href="#">induction of apoptosis</a>                | 4  | 8.2  | 0.072    | 4.03   |

<sup>a</sup>. For clarity and simplicity, only representative (i.e. the one with least P value) in each group of similar GO terms were given. For example, “blood vessel development” and “vasculature development” are similar to “blood vessel morphogenesis” and thus omitted from this list. Similarly, “regulation of apoptosis”, “regulation of programmed cell death”, “induction of programmed cell death” and “regulation of cell death” overlaps “induction of apoptosis” thus omitted in this table. For the whole lists of GO, please refer to supplementary Table x.

**Table S5. Expression levels of S100A family members in S100A8-treated HUVEC compared with control cells**

| Probe        | Gene    | 4hr Signal (mean) <sup>a</sup> |         | 4hr Ratio <sup>b</sup> |       | 24hr signal (mean) <sup>a</sup> |         | 24hr Ratio <sup>b</sup> |       |
|--------------|---------|--------------------------------|---------|------------------------|-------|---------------------------------|---------|-------------------------|-------|
|              |         | Control                        | S100A8  | Mean                   | Stdev | Control                         | S100A8  | Mean                    | Stdev |
| A_23_P137984 | S100A10 | 62774.1                        | 64817.9 | 1.035                  | 0.046 | 61219.6                         | 69547.2 | 1.139                   | 0.063 |
| A_23_P126593 | S100A11 | 20579.4                        | 24018.0 | 1.168                  | 0.083 | 21724.7                         | 24256.9 | 1.117                   | 0.112 |
| A_23_P145863 | S100A11 | 22441.6                        | 23169.6 | 1.031                  | 0.086 | 23787.3                         | 23388.7 | 0.983                   | 0.072 |
| A_23_P372874 | S100A13 | 44426.6                        | 45256.3 | 1.021                  | 0.080 | 42314.6                         | 47599.2 | 1.126                   | 0.050 |
| A_23_P147918 | S100A16 | 30449.6                        | 30527.1 | 1.002                  | 0.022 | 28849.5                         | 28965.2 | 1.004                   | 0.021 |
| A_23_P201706 | S100A2  | 12544.5                        | 10876.3 | 0.868                  | 0.052 | 7201.4                          | 5968.9  | 0.832                   | 0.054 |
| A_23_P104073 | S100A3  | 4291.4                         | 3752.1  | 0.875                  | 0.020 | 3466.9                          | 3153.7  | 0.909                   | 0.033 |
| A_23_P94800  | S100A4  | 347.1                          | 295.2   | 0.852                  | 0.067 | 291.6                           | 257.2   | 0.883                   | 0.065 |
| A_23_P201711 | S100A6  | 92629.2                        | 38507.6 | 0.418                  | 0.043 | 106115.7                        | 58853.7 | 0.552                   | 0.036 |
| A_24_P222835 | S100PBP | 973.3                          | 1028.6  | 1.058                  | 0.048 | 1008.1                          | 1070.9  | 1.065                   | 0.115 |
| A_23_P338952 | S100PBP | 1783.4                         | 1719.3  | 0.966                  | 0.076 | 1754.5                          | 1780.0  | 1.014                   | 0.082 |
| A_23_P200425 | S100PBP | 2362.1                         | 2174.5  | 0.920                  | 0.030 | 2374.2                          | 2248.8  | 0.946                   | 0.92  |

a. Shown were mean of three arrays in each group. b. Mean and standard deviation of ratios in three arrays were give.

**Table S6. Comparison of cell cycle-related gene expression in Viemann studies (with 200µg/mL S100A8/A9) (1, 2) to that of current study (with 10µg/mL S100A8 only)**

| <b>Genes up-regulated over 1.7 folds at 6 hr by S100A8/A9</b> | <b>Our data at 4 hr</b>   | <b>Genes down-regulated over 1.7 folds at 6 hr by S100A8/A9</b> | <b>Our data at 4 hr</b>   |
|---------------------------------------------------------------|---------------------------|-----------------------------------------------------------------|---------------------------|
| Bak (Bcl-2—antagonist/killer 1)<br>BAK1                       | 1.320                     | ERCC5 (excision repair protein complementation group 5)         | 0.994                     |
| Bax (Bcl-2—associated X protein)                              | 0.886,<br>0.790,<br>0.737 | NEK3 (never in mitosis gene A-related kinase 3)                 | 1.129,<br>1.036,<br>1.027 |
| TP53 (Transcription factor p53)                               | 0.943                     | MAD2L1 (MAD2 (mitotic arrest deficient 2)—like 1)               | 0.975                     |
|                                                               |                           | CDC2 (Cell division cycle 2 (G1 to S and G2 to M))              | 1.018                     |
|                                                               |                           | API5 (Apoptosis inhibitor 5)                                    | 1.033,<br>0.903           |
|                                                               |                           | NEK4 (NIMA-related kinase 4)                                    |                           |
|                                                               |                           | STAG2 (Stromal antigen 2)                                       | 1.028,<br>1.105           |
|                                                               |                           | CFLAR (c-FLIP (CASP8 and FADD-like apoptosis regulator))        | 0.968,<br>1.104           |
|                                                               |                           | CGRRF1 (Cell growth regulator with ring finger domain 1)        | 1.135,<br>1.019           |
|                                                               |                           | BBP (Beta-amyloid binding protein)                              |                           |
|                                                               |                           | PMS1 (Postmeiotic segregation increased 1)                      | 1.050                     |
|                                                               |                           | CAST (Calpastatin)                                              | 1.143,<br>0.987           |
|                                                               |                           | RB1 (Retinoblastoma 1)                                          | 1.060,<br>1.032           |

**Table S7. Summary of references concerning S100A8/A9 in tumors form patients or tumor cells lines**

| Tumor                                                           | Methods <sup>a</sup>       | Main findings <sup>b</sup>                                                                                                                                                                                                                                                                                                                                             | Ref. |
|-----------------------------------------------------------------|----------------------------|------------------------------------------------------------------------------------------------------------------------------------------------------------------------------------------------------------------------------------------------------------------------------------------------------------------------------------------------------------------------|------|
| <b>Positive relationship of S100A8/A9 expression with tumor</b> |                            |                                                                                                                                                                                                                                                                                                                                                                        |      |
| squamous cervical cancer (SCC)                                  | 2DE-MS, WB, IHC            | S100A9 protein was highly up-regulated in SCC samples (by 2D-MS), found in all of 20 SCC tissues and 4 of 20 matched normal cervical tissues (by WB). Positive staining in all SSC samples but focal and weak staining in part of normal cervical tissues.                                                                                                             | (3)  |
| gastric cancer                                                  | MS                         | S100A8, A9 and $\alpha$ defensin 1, 2 were over-expressed in tumor biopsies compared with normal tissues.                                                                                                                                                                                                                                                              | (4)  |
| invasive ductal carcinoma of the breast                         | IHC                        | S100A8 is S100A9-dependently expressed. Co-expression of both proteins was associated with poor tumor differentiation, vessel invasion, node metastasis, and advanced stage. Co-expression of the proteins was also observed in MCF-7 cells.                                                                                                                           | (5)  |
| advanced stage ovarian cancer                                   | 2DE-MS, IHC                | S100A8 was significantly up-regulated in pathological tissues and interstitial fluid. Weak S100A8 expression in epithelium but not stroma of normal ovarian tissues.                                                                                                                                                                                                   | (6)  |
| colorectal cancer (CRC) samples                                 | 2DE-MS, IHC, RT-PCR        | S100A8 and S100A9 were over-expressed in both CRC tumor samples and serum. IHC showed that S100A8/A9 were mainly in tumor infiltrating immune cells rather than in tumor cells.                                                                                                                                                                                        | (7)  |
| human breast tumor cell line and patients samples               | MS, MA, IHC (tissue array) | S100A9 was over expressed in basal-like compared to luminal-like cell lines, and much more frequently expressed in basal-like tumors versus luminal-like tumors. Higher expression of S100A9 was associated with lower metastasis-free and overall survival rates.                                                                                                     | (8)  |
| non-muscle-invasive bladder cancer (NMIBC)                      | RT-qPCR                    | S100A8 may contribute to the generation of certain aspects of the aggressive phenotype rather than simply promoting cell proliferation in NMIBC.                                                                                                                                                                                                                       | (9)  |
| muscle invasive bladder cancer (MIBC),                          | MA, RT-qPCR                | Together with <i>IL1B</i> and <i>EGFR</i> , <i>S100A8</i> and <i>S100A9</i> form a <i>four-gene</i> indicator of tumor progression.                                                                                                                                                                                                                                    | (10) |
| human prostate cancers                                          | IHC, ISH, ELISA            | S100A8, S100A9, and their potential receptor RAGE were up-regulated in prostatic intraepithelial neoplasia and preferentially in high-grade adenocarcinomas, whereas benign tissue was negative or showed weak expression of the proteins. There was a high degree of overlap of S100A8 and S100A9 expression patterns and of S100A8 or S100A9 and RAGE, respectively. | (11) |
| bladder cancer                                                  | HPLC,                      | S100A8 was over-expression more often in tumor with bladder                                                                                                                                                                                                                                                                                                            | (12) |



|                                                                                                                           |                            |                                                                                                                                                                                                                                                                                                                                       |      |
|---------------------------------------------------------------------------------------------------------------------------|----------------------------|---------------------------------------------------------------------------------------------------------------------------------------------------------------------------------------------------------------------------------------------------------------------------------------------------------------------------------------|------|
|                                                                                                                           | 2DE-MS,<br>IHC             | wall muscle invasion than in those without invasion. Abnormal expression of S100A8 and A9 are correlated with poor prognosis                                                                                                                                                                                                          |      |
| pancreatic adenocarcinoma                                                                                                 | 2DE-MS                     | Enhanced expression of S100A8, S100A9, and RAGE is an early event in prostate tumorigenesis and may contribute to development and progression or extension of prostate carcinomas. Furthermore, S100A9 in serum may serve as useful marker to discriminate between prostate cancer and BPH                                            | (13) |
| chemical-induced mouse and rat bladder cancers, human bladder cancers                                                     | Array,<br>RT-qPCR          | Human cancers over-express S100A2, A3, A5, A7, A8, A9, A14, A15, A16 and S100P, and underexpress S100A1, A4 and S100B. S100A1, A3, A8, A9, A14, A15 and A16 showed similar change patterns in bladder cancers from mouse, rat and human.                                                                                              | (14) |
| 21 common tumor types                                                                                                     | Tissue array               | A8 and A9 were expressed in 12% and 28% of breast cancers, respectively. S100A11 exclusively expressed in nuclear in normal tissues but translocated to cytoplasmic and nuclear in all common cancers.                                                                                                                                | (15) |
| <b>Negative relationship of S100A8/A9 expression with tumor</b>                                                           |                            |                                                                                                                                                                                                                                                                                                                                       |      |
| untransformed and isogenic human breast cancer cell lines including a normal, benign, noninvasive and invasive carcinoma. | MA,<br>RT-PCR,<br>WB       | Down-regulation of TNFSF7, S100A4, S100A7, S100A8, and S100A9 (calcium binding protein family) were associated with transformation and progression of breast cancer cells. Exogenous expressions of S100A8 and S100A9 inhibit growth in benign and noninvasive carcinoma cells, suggesting their negative role in cell proliferation. | (16) |
| oral brush of normal, premalignant, and tumor cells                                                                       | ProteinChip Arrays,<br>IHC | S100A8 and S100A9 distinguish between normal cells (high expression) and tumor cells (expression undetectable) with a sensitivity of 100% and specificity of 91% and can distinguish inflammatory/hyperproliferative lesions (intermediate expression) from tumor cells with a sensitivity of up to 91% and specificity of up to 90%. | (17) |
| human esophageal squamous cell carcinoma (ESCC) versus normal esophageal                                                  | RT-PCR                     | S100A1, A2, A4, A8, A9, A10, A11, A12, A14, S100B, and S100P genes were significantly down-regulated in ESCC while S100A7 markedly up-regulated                                                                                                                                                                                       | (18) |

|         |  |  |  |
|---------|--|--|--|
| mucosa. |  |  |  |
|---------|--|--|--|

a.2DE-MS, two dimension gel electrophoresis followed by mass spectrum of interested protein spors.  
WB, western blotting. IHC, immunohisotchemistry. RT-PCR, reverse transcription-PCR. RT-qPCR,  
RT-quantitative PCR. MA, microarray. ISH, in situ hybridization. HPLC, high performance liquid  
chromatography. b.some of the statements were directly copied from original references while others  
edited from references.



## Reference:

1. Viemann D, Strey A, Janning A, et al. Myeloid-related proteins 8 and 14 induce a specific inflammatory response in human microvascular endothelial cells. *Blood* 2005;**105**:2955-62.
2. Viemann D, Barczyk K, Vogl T, et al. MRP8/MRP14 impairs endothelial integrity and induces a caspase-dependent and -independent cell death program. *Blood* 2007;**109**:2453-60.
3. Zhu X, Lv J, Yu L, Wu J, Zou S, Jiang S. Proteomic identification of differentially-expressed proteins in squamous cervical cancer. *Gynecol Oncol* 2009;**112**:248-56.
4. Kim HK, Reyzer ML, Choi IJ, et al. Gastric cancer-specific protein profile identified using endoscopic biopsy samples via MALDI mass spectrometry. *J Proteome Res* 2010;**9**:4123-30.
5. Arai K, Takano S, Teratani T, Ito Y, Yamada T, Nozawa R. S100A8 and S100A9 overexpression is associated with poor pathological parameters in invasive ductal carcinoma of the breast. *Curr Cancer Drug Targets* 2008;**8**:243-52.
6. Cortesi L, Rossi E, Della Casa L, et al. Protein expression patterns associated with advanced stage ovarian cancer. *Electrophoresis* 2011;**32**:1992-2003.
7. Kim HJ, Kang HJ, Lee H, et al. Identification of S100A8 and S100A9 as serological markers for colorectal cancer. *J Proteome Res* 2009;**8**:1368-79.
8. Goncalves A, Charafe-Jauffret E, Bertucci F, et al. Protein profiling of human breast tumor cells identifies novel biomarkers associated with molecular subtypes. *Mol Cell Proteomics* 2008;**7**:1420-33.
9. Ha YS, Kim MJ, Yoon HY, et al. mRNA Expression of S100A8 as a Prognostic Marker for Progression of Non-Muscle-Invasive Bladder Cancer. *Korean J Urol* 2010;**51**:15-20.
10. Kim WJ, Kim SK, Jeong P, et al. A four-gene signature predicts disease progression in muscle invasive bladder cancer. *Mol Med* 2011;**17**:478-85.
11. Hermani A, Hess J, De Servi B, et al. Calcium-binding proteins S100A8 and S100A9 as novel diagnostic markers in human prostate cancer. *Clin Cancer Res* 2005;**11**:5146-52.
12. Minami S, Sato Y, Matsumoto T, et al. Proteomic study of sera from patients with bladder cancer: usefulness of S100A8 and S100A9 proteins. *Cancer Genomics Proteomics* 2010;**7**:181-9.
13. Shen J, Person MD, Zhu J, Abbruzzese JL, Li D. Protein expression profiles in pancreatic adenocarcinoma compared with normal pancreatic tissue and tissue affected by pancreatitis as detected by two-dimensional gel electrophoresis and mass spectrometry. *Cancer Res* 2004;**64**:9018-26.
14. Yao R, Lopez-Beltran A, Maclennan GT, Montironi R, Eble JN, Cheng L. Expression of S100 protein family members in the pathogenesis of bladder tumors. *Anticancer Res* 2007;**27**:3051-8.
15. Cross SS, Hamdy FC, Deloulme JC, Rehman I. Expression of S100 proteins in normal human tissues and common cancers using tissue microarrays: S100A6, S100A8, S100A9 and S100A11 are all overexpressed in common cancers. *Histopathology* 2005;**46**:256-69.
16. Rhee DK, Park SH, Jang YK. Molecular signatures associated with transformation and progression to breast cancer in the isogenic MCF10 model. *Genomics* 2008;**92**:419-28.
17. Driemel O, Murzik U, Escher N, et al. Protein profiling of oral brush biopsies: S100A8 and S100A9 can differentiate between normal, premalignant, and tumor cells. *Proteomics Clin Appl* 2007;**1**:486-93.
18. Ji J, Zhao L, Wang X, et al. Differential expression of S100 gene family in human esophageal squamous cell carcinoma. *J Cancer Res Clin Oncol* 2004;**130**:480-6.
